# Supplementary material for: Characterization of the reaction products, kinetics and mechanism of oxidation of the drug captopril by platinum(iv) complexes
Source: Royal Society of Chemistry journal article supplement (doi:10.1039/c3ra45020a), 2013-11-25
Supplement: c3ra45020a.pdf [file c3ra45020a.pdf]

Supplementary materials for:

**Characterizations of the reaction products, kinetics and mechanism of oxidation of the drug captopril by platinum(IV) complexes**

Shuying Huo, Jingran Dong, Changying Song, Jianzhong Xu, Shigang Shen,\* Yanli Ren, and Tiesheng Shi\*

College of Chemistry and Environmental Science, and Key Laboratory of Medicinal Chemistry and Molecular Diagnostics (the Ministry of Education), Hebei University, Baoding 071002, Hebei Province, P. R. China

Two supporting tables (**Tables S1 and S2**) and two supporting figures (**Figures S1 and S2**) are included in this supplementary material.

**Table S1.** The measured observed rate constants for the reduction of *trans*-[PtCl<sub>2</sub>(CN)<sub>4</sub>]<sup>2-</sup> by captopril at 25.0 °C and ionic strength of 1.0 M

| pH   | [Captopril]/mM | $k_{\text{obsd}}/\text{s}^{-1}$  | $k_{\text{c}}/\text{s}^{-1}$ <sup>a</sup> |
|------|----------------|----------------------------------|-------------------------------------------|
| 3.22 | 1.00           | $(5.73 \pm 0.06) \times 10^{-2}$ |                                           |
| 3.69 | 0.20           | $4.94 \times 10^{-2}$            | $(8.8 \pm 0.9) \times 10^{-3}$            |
|      | 0.30           | $7.08 \times 10^{-2}$            |                                           |
|      | 0.50           | 0.112                            |                                           |
|      | 1.00           | 0.218                            |                                           |
|      | 1.50           | 0.319                            |                                           |
|      | 2.00           | 0.422                            |                                           |
| 4.28 | 0.20           | 0.176                            | $0.028 \pm 0.003$                         |
|      | 0.30           | 0.248                            |                                           |
|      | 0.50           | 0.399                            |                                           |
|      | 1.00           | 0.759                            |                                           |
|      | 1.50           | 1.13                             |                                           |
|      | 2.00           | 1.50                             |                                           |
| 4.82 | 0.20           | 0.603                            | $0.07 \pm 0.02$                           |
|      | 0.30           | 0.85                             |                                           |
|      | 0.50           | 1.40                             |                                           |
|      | 1.00           | 2.73                             |                                           |
|      | 1.50           | 4.09                             |                                           |
|      | 2.00           | 5.35                             |                                           |
| 5.32 | 0.20           | 1.33                             | $0.08 \pm 0.04$                           |
|      | 0.30           | 2.00                             |                                           |
|      | 0.50           | 3.33                             |                                           |
|      | 1.00           | 6.49                             |                                           |
|      | 1.50           | 9.57                             |                                           |
|      | 2.00           | 12.9                             |                                           |
| 5.35 | 0.20           | 1.74                             | $0.07 \pm 0.02$                           |
|      | 0.30           | 2.53                             |                                           |
|      | 0.50           | 4.14                             |                                           |
|      | 1.00           | 8.18                             |                                           |
|      | 1.50           | 12.3                             |                                           |
|      | 2.00           | 16.5                             |                                           |
| 5.97 | 0.20           | 8.20                             | $0.6 \pm 0.3$                             |
|      | 0.30           | 12.2                             |                                           |
|      | 0.50           | 19.5                             |                                           |
|      | 1.00           | 38.3                             |                                           |

|      |      |                |                 |
|------|------|----------------|-----------------|
|      | 1.50 | 56.6           |                 |
|      | 2.00 | 76.8           |                 |
| 6.85 | 0.20 | 40.3           | $-0.07 \pm 2.9$ |
|      | 0.30 | 58.4           |                 |
|      | 0.50 | 92.4           |                 |
|      | 1.00 | 184            |                 |
|      | 1.50 | 278            |                 |
|      | 2.00 | 381            |                 |
| 7.25 | 0.20 | 91.2           | $-0.03 \pm 2.9$ |
|      | 0.30 | 136            |                 |
|      | 0.50 | 216            |                 |
|      | 1.00 | 437            |                 |
|      | 1.50 | 664            |                 |
|      | 2.00 | 885            |                 |
| 7.35 | 0.20 | $83.5 \pm 2.5$ |                 |
| 7.85 | 0.20 | $251 \pm 8$    |                 |

---

<sup>a</sup> Values of the intercepts  $k_c$  were obtained from the linear plots of  $k_{\text{obsd}}$  versus [Captopril].

**Table S2.** The measured observed rate constants for the reduction of *cis*-[Pt(NH<sub>3</sub>)<sub>2</sub>Cl<sub>4</sub>] by captopril at 25.0 °C and ionic strength of 1.0 M <sup>a</sup>

| pH   | [Captopril]/mM | $k_{\text{obsd}}/\text{s}^{-1}$ | $k_c/\text{s}^{-1\text{c}}$    |
|------|----------------|---------------------------------|--------------------------------|
| 3.69 | 1.50           | $3.18 \times 10^{-3}$           | $(1.2 \pm 0.2) \times 10^{-3}$ |
|      | 2.00           | $3.85 \times 10^{-3}$           |                                |
| 4.21 | 0.20           | $1.67 \times 10^{-3}$           | $(0.5 \pm 0.1) \times 10^{-3}$ |
|      | 0.30           | $2.28 \times 10^{-3}$           |                                |
|      | 0.50           | $3.25 \times 10^{-3}$           |                                |
|      | 1.00           | $5.87 \times 10^{-3}$           |                                |
|      | 1.50           | $8.98 \times 10^{-3}$           |                                |
|      | 2.00           | $1.19 \times 10^{-2}$           |                                |
| 4.82 | 0.20           | $4.76 \times 10^{-3}$           | $(0.7 \pm 0.1) \times 10^{-3}$ |
|      | 0.30           | $6.58 \times 10^{-3}$           |                                |
|      | 0.50           | $1.07 \times 10^{-2}$           |                                |
|      | 1.00           | $2.07 \times 10^{-2}$           |                                |
|      | 1.50           | $3.09 \times 10^{-2}$           |                                |
|      | 2.00           | $4.04 \times 10^{-2}$           |                                |
| 5.35 | 0.20           | $1.89 \times 10^{-2}$           | $(0.6 \pm 0.1) \times 10^{-3}$ |
|      | 0.30           | $2.54 \times 10^{-2}$           |                                |
|      | 0.50           | $3.71 \times 10^{-2}$           |                                |
|      | 1.00           | $6.93 \times 10^{-2}$           |                                |
|      | 1.50           | 0.100                           |                                |
|      | 2.00           | 0.134                           |                                |
| 6.09 | 0.20           | $6.55 \times 10^{-2}$           | $(5.8 \pm 0.5) \times 10^{-3}$ |
|      | 0.30           | $9.14 \times 10^{-2}$           |                                |
|      | 0.50           | 0.144                           |                                |
|      | 1.00           | 0.274                           |                                |
|      | 1.50           | 0.414                           |                                |
|      | 2.00           | 0.568                           |                                |
| 6.85 | 0.20           | 0.296                           | $0.06 \pm 0.01$                |
|      | 0.30           | 0.424                           |                                |
|      | 0.50           | 0.675                           |                                |
|      | 1.00           | 1.31                            |                                |
|      | 1.50           | 1.90                            |                                |
|      | 2.00           | 2.50                            |                                |

|      |      |                  |                 |
|------|------|------------------|-----------------|
| 7.22 | 0.20 | 0.55             | $0.07 \pm 0.04$ |
|      | 0.30 | 0.92             |                 |
|      | 0.50 | 1.46             |                 |
|      | 1.00 | 2.84             |                 |
|      | 1.50 | 4.29             |                 |
|      | 2.00 | 5.51             |                 |
| 7.35 | 0.20 | 0.68             | $0.11 \pm 0.03$ |
|      | 0.30 | 1.03             |                 |
|      | 0.50 | 1.64             |                 |
|      | 1.00 | 3.09             |                 |
| 7.85 | 2.00 | $12.5 \pm 0.3^b$ |                 |
| 8.47 | 2.00 | $128 \pm 4^b$    |                 |
| 8.96 | 2.00 | $210 \pm 8^b$    |                 |
| 9.46 | 2.00 | $451 \pm 15^b$   |                 |

---

<sup>a</sup> Reaction followed at 240 nm; <sup>b</sup> Reaction followed at 280 nm. <sup>c</sup> Values of the intercepts  $k_c$  were obtained from the linear plots of  $k_{\text{obsd}}$  versus [Captopril].

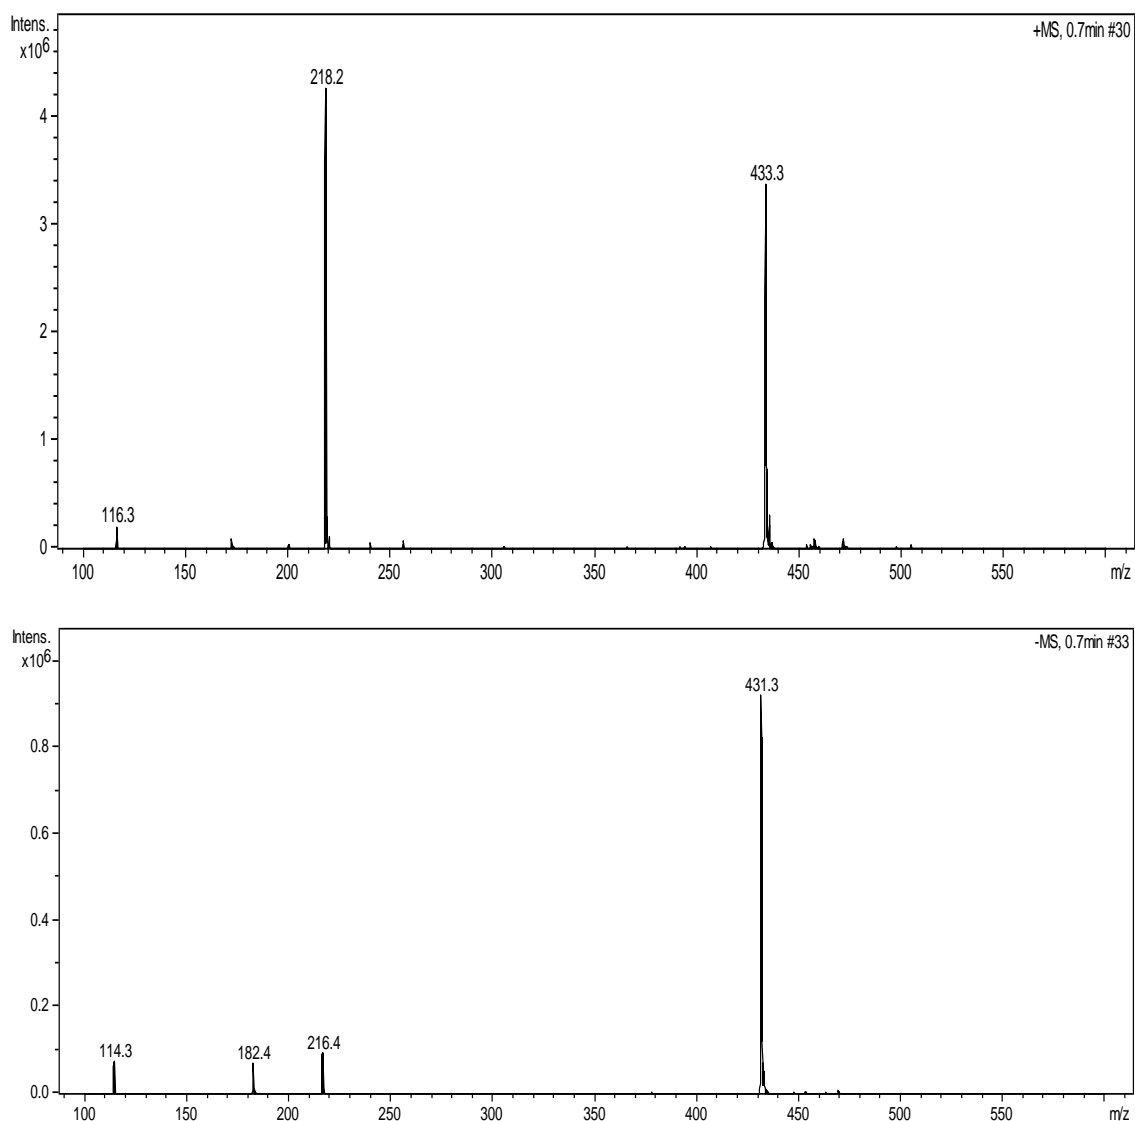

**Figure S1.** ESI mass spectra for the reaction mixture of 1 mM *trans*-[PtCl<sub>2</sub>(CN)<sub>4</sub>]<sup>2-</sup> with 8 mM captopril in 20 mM HCl. (Top): positive mode of ionization. (Bottom): negative mode of ionization

**Assignments for major peaks, (Top):**  $m/z = 218.2$  for [captopril+H<sup>+</sup>]<sup>+</sup>;  $m/z = 433.3$  for [captopril-disulfide+H<sup>+</sup>]<sup>+</sup>; **(Bottom):**  $m/z = 216.4$  for [captopril-H<sup>+</sup>]<sup>-</sup>;  $m/z = 431.3$  for [captopril-disulfide-H<sup>+</sup>]<sup>-</sup>.

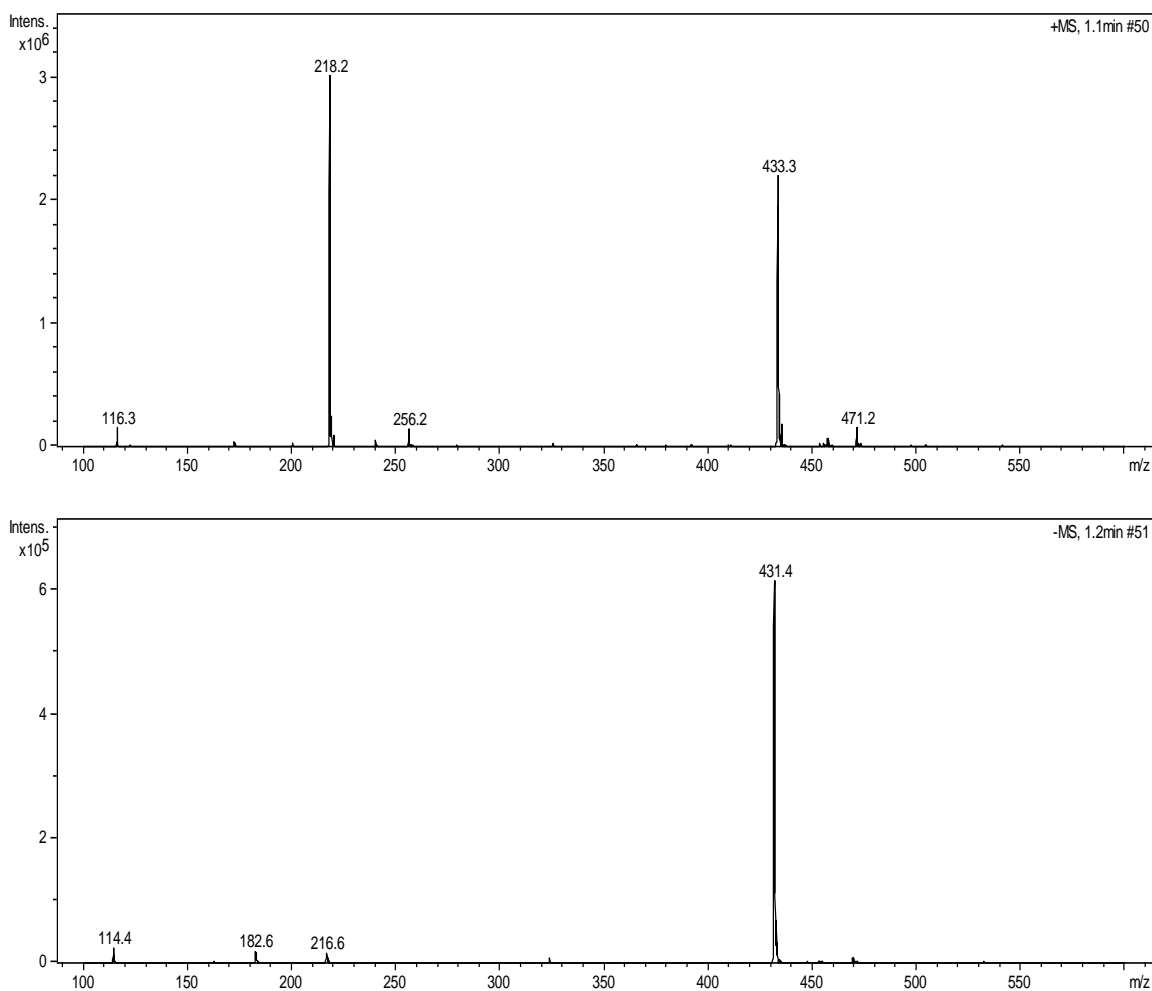

**Figure S2.** ESI mass spectra for the reaction mixture of 1 mM *cis*-[Pt(NH<sub>3</sub>)<sub>2</sub>Cl<sub>4</sub>] with 8 mM captopril in 10 mM HCl. (Top): positive mode of ionization. (Bottom): negative mode of ionization.

**Assignments for major peaks, (Top):**  $m/z = 218.2$  for [captopril+H<sup>+</sup>]<sup>+</sup>;  $m/z = 256.2$  for [captopril+K<sup>+</sup>]<sup>+</sup>;  $m/z = 433.3$  for [captopril-disulfide+H<sup>+</sup>]<sup>+</sup>;  $m/z = 471.2$  for [captopril-disulfide+K<sup>+</sup>]<sup>+</sup>; **(Bottom):**  $m/z = 216.6$  for [captopril-H<sup>+</sup>]<sup>-</sup>;  $m/z = 431.4$  for [captopril-disulfide-H<sup>+</sup>]<sup>-</sup>.

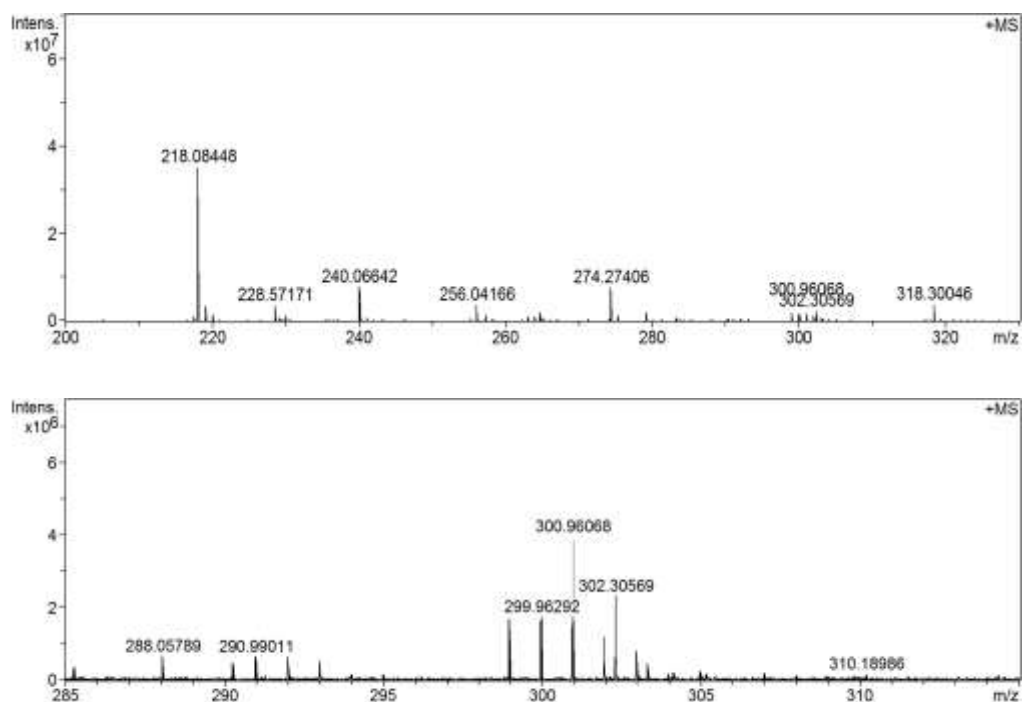

**Figure S3. (Top):** ESI mass spectrum for a very fresh sample containing 1 mM captopril and 1 mM cisplatin (the reduced product from *cis*-[Pt(NH<sub>3</sub>)<sub>2</sub>Cl<sub>4</sub>]) in 20 mM HCl. Peak assignments:  $m/z = 218.08$  for [captopril+H<sup>+</sup>]<sup>+</sup>;  $m/z = 240.06$  for [captopril+Na<sup>+</sup>]<sup>+</sup>;  $m/z = 256.04$  for [captopril+K<sup>+</sup>]<sup>+</sup>. Peaks from [cisplatin+H<sup>+</sup>]<sup>+</sup> around  $m/z = 301$  are very weak.

**(Bottom):** Enlargement about 10 times for the spectral part between  $285 < m/z < 315$ . Peaks of  $m/z = 299, 300, 301,$  and  $302$  are all from the isotopic peaks of [cisplatin+H<sup>+</sup>]<sup>+</sup>, which are consistent with the theoretically isotopic pattern of [cisplatin+H<sup>+</sup>]<sup>+</sup>.
